# Supplementary material for: Are HIV-Infected Men Vulnerable to Prostate Cancer Treatment Disparities?
Source: Oxford University Press journal article supplement (doi:10.1158/1055-9965.epi-14-0614), 2014-07-26
Supplement: 10559965epi140614-sup-132395_1_supp_2554910_n8g89f.docx [file 10559965epi140614-sup-132395_1_supp_2554910_n8g89f.docx]

| Supplemental Table 3. Association Between HIV and Radical Prostatectomy by National Comprehensive Cancer Network (NCCN) Risk Group | | | |
| --- | --- | --- | --- |
|  |  |  |  |
|  | **HIV+**  **(N = 36)** | **HIV-**  **(N = 70)** |  |
| **NCCN Risk Group** | **RP Received (n, %)** | **RP Received (n, %)** | **P- Value** |
| Low | 3 (12.0%) | 26 (65.0%) | **< 0.001** |
|  |  |  |  |
| Intermediate | 1 (12.5%) | 13 (61.9%) | **0.02** |
|  |  |  |  |
| High/Very High | 2 (66.7%) | 5 (55.6%) | 0.73 |
|  |  |  |  |

*Chi-square tests were performed;* *analysis is limited to patients with clinically localized (non-metastatic) prostate cancer*; *NCCN risk classifications adapted from 2007 guidelines; RP=radical prostatectomy*
